# Supplementary material for: AIF1 was identified as an up-regulated gene contributing to CSFV Shimen infection in porcine alveolar macrophage 3D4/21 cells
Source: PeerJ. 2020 Feb 17;8:e8543. doi: 10.7717/peerj.8543 (PMC7032059; doi:10.7717/peerj.8543)
Supplement: Supplemental Information 2 [file peerj-08-8543-s008.xlsx]

## Sheet: Fig.1B
CSFV	AIF1	GAPDH	△CT		Standard reference	△△CT	—△△CT		average	standard deviation
0h	28.2165	19.5155	8.701		9.3424	-0.6414	0.6414	1.55984	1.00046	0.491163
	28.3485	19.0121	9.3364		9.0177	0.3187	-0.3187	0.801792
	28.5795	18.5897	9.9898		9.3454	0.6444	-0.6444	0.639759
12h	27.1167	19.3898	7.7269		9.3454	-1.6185	1.6185	3.07056	3.83185	0.720229
	26.7055	19.3319	7.3736		9.3454	-1.9718	1.9718	3.92257
	26.4944	19.3197	7.1747		9.3454	-2.1707	2.1707	4.50242
24h	26.6948	19.372	7.3228		9.3454	-2.0226	2.0226	4.06315	4.74312	0.640063
	26.3539	19.2812	7.0727		9.3454	-2.2727	2.2727	4.83227
	26.1385	19.2083	6.9302		9.3454	-2.4152	2.4152	5.33393
48h	25.7112	19.0486	6.6626		9.3454	-2.6828	2.6828	6.42101	6.91775	0.671377
	25.4153	19.0113	6.404		9.3454	-2.9414	2.9414	7.68156
	25.2188	18.6069	6.6119		9.3454	-2.7335	2.7335	6.65067
control	AIF1	GAPDH	△CT		Standard reference	△△CT	—△△CT		average	standard deviation
	27.768	17.575	10.193		10.43	-0.237	0.237	1.17854	1.05576	0.389317
0h	27.132	17.155	9.977		10.43	-0.453	0.453	1.36888
	27.98	16.86	11.12		10.43	0.69	-0.69	0.619854
12h	25.137	15.308	9.829		10.43	-0.601	0.601	1.51677	0.955524	0.501607
	25.911	15.157	10.754		10.43	0.324	-0.324	0.798852
	26.28	14.99	11.29		10.43	0.86	-0.86	0.550953
24h	25.992	15.768	10.224		10.43	-0.206	0.206	1.15349	1.19709	0.0989839
	25.393	15.136	10.257		10.43	-0.173	0.173	1.1274
	25.12	15.08	10.04		10.43	-0.39	0.39	1.31039
	26.398	16.664	9.734		10.43	-0.696	0.696	1.62001	1.10718	0.568079
48h	27.112	16.951	10.161		10.43	-0.269	0.269	1.20497
	27.06	15.62	11.44		10.43	1.01	-1.01	0.496546

## Sheet: Fig.1C
control	IL6	GAPDH	△CT		Standard reference	△△CT	—△△CT		average	standard deviation
0h	27.413	15.108	12.31		12.094	0.211	-0.211	0.864	1.006	0.131
	27.862	15.811	12.05		12.094	-0.043	0.043	1.03
	27.151	15.225	11.93		12.094	-0.168	0.168	1.123
12h	28.007	15.768	12.24		12.094	0.145	-0.145	0.904	1.167	0.523
	28.352	15.986	12.37		12.094	0.272	-0.272	0.828
	27.539	16.268	11.27		12.094	-0.823	0.823	1.769
24h	28.599	16.43	12.17		12.094	0.075	-0.075	0.949	0.939	0.113
	28.956	16.577	12.38		12.094	0.285	-0.285	0.821
	28.649	16.621	12.03		12.094	-0.066	0.066	1.047
48h	27.023	14.912	12.11		12.094	0.017	-0.017	0.988	0.906	0.072
	27.334	15.022	12.31		12.094	0.218	-0.218	0.86
	27.611	15.315	12.3		12.094	0.202	-0.202	0.869
csfv	IL6	GAPDH	△CT		Standard reference	△△CT	—△△CT		average	standard deviation
	30.169	17.575	12.59		12.664	-0.07	0.07	1.05	1.012	0.185
0h	30.315	17.884	12.43		12.664	-0.233	0.233	1.175
	30.913	17.946	12.97		12.664	0.303	-0.303	0.811
12h	26.975	15.1366	11.84		12.664	-0.826	0.826	1.772	1.665	0.145
	27.172	15.093	12.08		12.664	-0.585	0.585	1.5
	26.565	14.6863	11.88		12.664	-0.785	0.785	1.723
24h	28.685	17.386	11.3		12.664	-1.365	1.365	2.576	2.329	0.38
	28.703	17.372	11.33		12.664	-1.333	1.333	2.519
	29.008	17.263	11.75		12.664	-0.919	0.919	1.891
	27.026	15.299	11.73		12.664	-0.937	0.937	1.915	2.659	0.647
48h	27.007	15.967	11.04		12.664	-1.624	1.624	3.082
	26.906	15.817	11.09		12.664	-1.575	1.575	2.979

## Sheet: Fig.3B
	AIF1	GAPDH	△CT		Standard reference	△△CT	—△△CT		average	standard deviation
control	24.0231	15.6579	8.3652		8.29507	0.0701333	-0.0701333	0.95255	1.00077	0.0479553
	24.2653	15.9721	8.2932		8.29507	-0.00186667	0.00186667	1.00129
	24.3519	16.1251	8.2268		8.29507	-0.0682667	0.0682667	1.04846
NC	24.1431	15.7675	8.3756		8.29507	0.0805333	-0.0805333	0.945708	0.961335	0.0636097
	24.0218	15.7712	8.2506		8.29507	-0.0444667	0.0444667	1.0313
	24.4215	15.9856	8.4359		8.29507	0.140833	-0.140833	0.906995
over-expression-AIF1	22.3517	15.7923	6.5594		8.29507	-1.73567	1.73567	3.33033	2.89023	0.409442
	23.0239	16.0626	6.9613		8.29507	-1.33377	1.33377	2.5206
	22.8998	16.1003	6.7995		8.29507	-1.49557	1.49557	2.81975

## Sheet: Fig.3D
	IL6	β-actin	△CT		Standard reference	△△CT	—△△CT		average	standard deviation
over-expression AIF1-Oh	27.1514	15.3411	11.8103		12.1081	-0.297767	0.297767	1.22924	1.01449	0.209608
	27.1768	15.0742	12.1026		12.1081	-0.00546667	0.00546667	1.0038
	27.5116	15.1003	12.4113		12.1081	0.303233	-0.303233	0.810434
over-expression AIF1-12h	27.2255	15.7424	11.4831		12.0081	-0.524967	0.524967	1.4389	1.49381	0.174676
	27.2244	15.6527	11.5717		12.0081	-0.436367	0.436367	1.35319
	27.2271	15.9755	11.2516		12.0081	-0.756467	0.756467	1.68935
over-expression AIF1-24h	26.4612	15.4477	11.0135		12.0081	-0.994567	0.994567	1.99248	2.59082	0.528105
	26.3709	15.8421	10.5288		12.0081	-1.47927	1.47927	2.78807
	26.1681	15.7411	10.427		12.0081	-1.58107	1.58107	2.99191
over-expression AIF1-48h	26.0788	15.7763	10.3025		12.0081	-1.70557	1.70557	3.26157	3.02873	0.495055
	26.4762	15.7669	10.7093		12.0081	-1.29877	1.29877	2.46018
	26.3232	16.0655	10.2577		12.0081	-1.75037	1.75037	3.36444

## Sheet: Fig.4B
	目标基因	GAPDH	△CT	Standard reference	△△CT	—△△CT		average	standard deviation
Control	25.3278	19.0809	6.2469	6.17693	0.0699667	-0.0699667	0.95266	1.00491	0.123887
	25.0127	18.7087	6.304	6.17697	0.127033	-0.127033	0.915713
	24.9101	18.9302	5.9799	6.17697	-0.197067	0.197067	1.14637
p-Si1	26.2425	18.4325	7.81	6.17697	1.63303	-1.63303	0.32241	0.339105	0.0959939
	25.5868	18.2331	7.3537	6.17697	1.17673	-1.17673	0.442352
	26.3821	18.2198	8.1623	6.17697	1.98533	-1.98533	0.252555
p-Si2	25.558	19.3628	6.1952	6.17697	0.0182333	-0.0182333	0.987441	0.874544	0.223441
	26.2016	19.3284	6.8732	6.17697	0.696233	-0.696233	0.617181
	25.6705	19.5207	6.1498	6.17697	-0.0271667	0.0271667	1.01901
p-Si3	25.3285	18.941	6.3875	6.17697	0.210533	-0.210533	0.864218	0.791054	0.0691536
	25.0476	18.4102	6.6374	6.17697	0.460433	-0.460433	0.726768
	25.121	18.5896	6.5314	6.17697	0.354433	-0.354433	0.782177
p-NC	24.6496	18.3491	6.3005	6.17697	0.123533	-0.123533	0.917937	0.969072	0.0477099
	24.871	18.6603	6.2107	6.17697	0.0337333	-0.0337333	0.976889
	24.9789	18.8197	6.1592	6.17697	-0.0177667	0.0177667	1.01239

## Sheet: Fig.4C
p-Si Oh	25.5452	15.3559	10.1893		10.0907	0.0985667	-0.0985667	0.93396	1.00263	0.0900692
	25.0033	15.0561	9.9472		10.0907	-0.143533	0.143533	1.10461
	25.1989	15.0632	10.1357		10.0907	0.0449667	-0.0449667	0.969312
p-Si 12h	26.0245	15.1854	10.8391		10.0907	0.748367	-0.748367	0.595277	0.901117	0.298585
	25.3128	15.4753	9.8375		10.0907	-0.253233	0.253233	1.19188
	25.6854	15.4684	10.217		10.0907	0.126267	-0.126267	0.916199
p-Si 24h	26.0194	15.8754	10.144		10.0907	0.0532667	-0.0532667	0.963752	0.781419	0.194532
	26.3377	15.4527	10.885		10.0907	0.794267	-0.794267	0.576636
	26.0534	15.6477	10.4057		10.0907	0.314967	-0.314967	0.80387
p-Si 48h	27.7481	15.2966	12.4515		10.0907	2.36077	-2.36077	0.194688	0.224631	0.0304203
	27.3485	15.0974	12.2511		10.0907	2.16037	-2.16037	0.223699
	27.1458	15.0865	12.0593		10.0907	1.96857	-1.96857	0.255507

## Sheet: Fig.4D
	IL6	GAPDH	△CT		Standard reference	△△CT	—△△CT		average	standard deviation
CSFV+P-NC 0h	29.0934	20.4891	8.6043		9.10247	-0.498167	0.498167	1.41242	1.03234	0.331436
	29.4738	20.1888	9.285		9.10243	0.182567	-0.182567	0.881134
	29.6101	20.192	9.4181		9.10243	0.315667	-0.315667	0.80348
CSFV+P-NC 12h	28.9903	20.3207	8.6696		9.10243	-0.432833	0.432833	1.34988	1.62175	0.388724
	28.5911	20.5362	8.0549		9.10243	-1.04753	1.04753	2.06699
	28.687	20.119	8.568		9.10243	-0.534433	0.534433	1.44837
CSFV+P-NC 24h	27.8045	19.5015	8.303		9.10243	-0.799433	0.799433	1.74042	1.90741	0.365827
	27.6103	19.2346	8.3757		9.10243	-0.726733	0.726733	1.65489
	27.37	19.486	7.884		9.10243	-1.21843	1.21843	2.32694
CSFV+P-NC 48h	27.2246	19.0288	8.1958		9.10243	-0.906633	0.906633	1.87467	2.25116	0.33902
	27.014	19.1421	7.8719		9.10243	-1.23053	1.23053	2.34654
	26.852	19.09	7.762		9.10243	-1.34043	1.34043	2.53227
	IL6	GAPDH	△CT		Standard reference	△△CT	—△△CT		average	standard deviation
CSFV+P-Si 0h	25.4155	20.1272	5.2883		5.39237	-0.104067	0.104067	1.0748	1.00865	0.156874
	25.1749	19.9481	5.2268		5.39237	-0.165567	0.165567	1.12161
	25.273	19.611	5.662		5.39237	0.269633	-0.269633	0.82953
CSFV+P-Si 12h	24.2805	18.7855	5.495		5.39237	0.102633	-0.102633	0.931331	0.749574	0.163054
	24.116	18.2116	5.9044		5.39237	0.512033	-0.512033	0.701233
	24.176	18.085	6.091		5.39237	0.698633	-0.698633	0.616156
CSFV+P-Si 24h	26.2905	19.8062	6.4843		5.39237	1.09193	-1.09193	0.469132	0.416052	0.0840359
	26.1806	19.6675	6.5131		5.39237	1.12073	-1.12073	0.45986
	26.117	19.077	7.04		5.39237	1.64763	-1.64763	0.319163
CSFV+P-Si 48h	26.0712	17.3281	8.7431		5.39237	3.35073	-3.35073	0.0980232	0.183328	0.0756035
	26.7483	19.1038	7.6445		5.39237	2.25213	-2.25213	0.209913
	26.055	18.616	7.439		5.39237	2.04663	-2.04663	0.242048

## Sheet: Fig.4E
control		IL6	GAPDH	△CT		Standard reference	△△CT	—△△CT		average	standard deviation
	0h	27.8412	15.7458	12.0954		12.5215	-0.426133	0.426133	1.34363	1.02828	0.297136
		27.9915	15.4521	12.5394		12.5215	0.0178667	-0.0178667	0.987692
		28.1953	15.2655	12.9298		12.5215	0.408267	-0.408267	0.753528
	12h	28.9867	16.7866	12.2001		12.5215	-0.321433	0.321433	1.24957	1.25223	0.00970372
		28.9516	16.7452	12.2064		12.5215	-0.315133	0.315133	1.24413
		28.9001	16.7154	12.1847		12.5215	-0.336833	0.336833	1.26298
	24h	26.7993	15.7651	11.0342		12.5215	-1.48733	1.48733	2.8037	2.24748	0.552249
		26.9346	15.5762	11.3584		12.5215	-1.16313	1.16313	2.23943
		27.2078	15.4512	11.7566		12.5215	-0.764933	0.764933	1.69929
	48h	26.8041	15.6442	11.1599		12.5215	-1.36163	1.36163	2.56976	2.56121	0.813294
		26.6012	15.8325	10.7687		12.5215	-1.75283	1.75283	3.3702
		26.8429	15.1235	11.7194		12.5215	-0.802133	0.802133	1.74368
over-expression AIF1		IL6	GAPDH	△CT		Standard reference	△△CT	—△△CT		average	standard deviation
	0h	27.2634	17.5052	9.7582		9.91217	-0.153967	0.153967	1.11262	1.00663	0.138074
		27.3538	17.5213	9.8325		9.91217	-0.0796667	0.0796667	1.05677
		27.6929	17.5471	10.1458		9.91217	0.233633	-0.233633	0.85049
	12h	26.9204	18.3952	8.5252		9.91217	-1.38697	1.38697	2.61528	2.42512	0.170091
		27.0891	18.4234	8.6657		9.91217	-1.24647	1.24647	2.3726
		27.172	18.4536	8.7184		9.91217	-1.19377	1.19377	2.28749
	24h	25.0564	16.987	8.0694		9.91217	-1.84277	1.84277	3.58697	3.82108	0.326315
		25.0367	17.0052	8.0315		9.91217	-1.88067	1.88067	3.68245
		25.0111	17.1672	7.8439		9.91217	-2.06827	2.06827	4.19383
	48h	24.0308	16.8032	7.2276		9.91217	-2.68457	2.68457	6.42888	5.79114	0.710379
		24.3586	17.0118	7.3468		9.91217	-2.56537	2.56537	5.91905
		24.6968	17.1139	7.5829		9.91217	-2.32927	2.32927	5.0255

## Sheet: Fig.5A
control	CSFV	GAPDH	△CT		Standard reference	△△CT	—△△CT		average	standard deviation
0h	26.3885	19.5155	6.873		7.57503	-0.702033	0.702033	1.6268	1.13016	0.589853
	27.2291	18.5897	8.6394		7.57503	1.06437	-1.06437	0.478183
	26.3869	19.1742	7.2127		7.57503	-0.362333	0.362333	1.2855
12h	24.3531	19.6898	4.6633		7.57503	-2.91173	2.91173	7.52522	6.43132	0.985916
	24.2724	19.3197	4.9527		7.57503	-2.62233	2.62233	6.15745
	24.1379	19.0512	5.0867		7.57503	-2.48833	2.48833	5.61129
24h	19.3345	19.302	0.0325		7.57503	-7.54253	7.54253	186.436	157.593	30.2249
	19.8243	19.2283	0.596		7.57503	-6.97903	6.97903	126.153
	19.5255	19.2741	0.2514		7.57503	-7.32363	7.32363	160.189
48h	17.4531	19.0486	-1.5955		7.57503	-9.17053	9.17053	576.243	534.108	46.9568
	17.0982	18.6069	-1.5087		7.57503	-9.08373	9.08373	542.596
	17.5534	18.8957	-1.3423		7.57503	-8.91733	8.91733	483.487
si	CSFV	GAPDH	△CT		Standard reference	△△CT	—△△CT		average	standard deviation
0h	27.42	19.2364	8.1836		8.52533	-0.341733	0.341733	1.26728	1.01487	0.22005
	27.4047	18.7496	8.6551		8.52533	0.129767	-0.129767	0.913979
	27.1324	18.3951	8.7373		8.52533	0.211967	-0.211967	0.86336
12h	25.7961	19.6053	6.1908		8.52533	-2.33453	2.33453	5.04388	3.47104	1.38719
	26.6476	19.3985	7.2491		8.52533	-1.27623	1.27623	2.42206
	26.1852	19.2192	6.966		8.52533	-1.55933	1.55933	2.94718
24h	23.4009	19.5415	3.8594		8.52533	-4.66593	4.66593	25.3855	33.4943	7.02336
	22.5171	19.218	3.2991		8.52533	-5.22623	5.22623	37.4329
	22.7588	19.4686	3.2902		8.52533	-5.23513	5.23513	37.6645
48h	20.349	19.0933	1.2557		8.52533	-7.26963	7.26963	154.304	124.466	28.0022
	20.9611	19.0616	1.8995		8.52533	-6.62583	6.62583	98.7585
	20.6857	19.0713	1.6144		8.52533	-6.91093	6.91093	120.337
nc	CSFV	GAPDH	△CT		Standard reference	△△CT	—△△CT		average	standard deviation
0h	28.0038	18.0127	9.9911		9.80703	0.184067	-0.184067	0.880218	1.00495	0.121413
	27.8596	18.2196	9.64		9.80703	-0.167033	0.167033	1.12275
	27.9215	18.1315	9.79		9.80703	-0.0170333	0.0170333	1.01188
12h	26.318	18.6567	7.6613		9.80703	-2.14573	2.14573	4.42517	5.33433	0.855293
	26.4861	19.2933	7.1928		9.80703	-2.61423	2.61423	6.12298
	26.1213	18.7618	7.3595		9.80703	-2.44753	2.44753	5.45483
24h	21.2827	18.565	2.7177		9.80703	-7.08933	7.08933	136.176	145.183	12.1103
	21.6746	19.18	2.4946		9.80703	-7.31243	7.31243	158.95
	21.4565	18.7831	2.6734		9.80703	-7.13363	7.13363	140.423
48h	19.9478	19.1032	0.8446		9.80703	-8.96243	8.96243	498.84	514.436	15.6882
	19.7262	18.9696	0.7566		9.80703	-9.05043	9.05043	530.215
	19.8152	19.0145	0.8007		9.80703	-9.00633	9.00633	514.253
over-expression AIF1		CSFV	GAPDH	△CT		Standard reference	△△CT	—△△CT		average	standard deviation
	0h	29.0148	17.5052	11.5096		11.2705	0.239133	-0.239133	0.847254	1.0101	0.17618
		28.8139	17.523	11.2909		11.2705	0.0204333	-0.0204333	0.985937
		28.558	17.5471	11.0109		11.2705	-0.259567	0.259567	1.19712
	12h	29.0406	18.3952	10.6454		11.2705	-0.625067	0.625067	1.54228	7.03885	6.26298
		27.1845	18.4293	8.7552		11.2705	-2.51527	2.51527	5.71703
		25.9315	18.4536	7.4779		11.2705	-3.79257	3.79257	13.8572
	24h	20.6938	17.087	3.6068		11.2705	-7.66367	7.66367	202.765	249.386	47.5937
		20.4015	17.0823	3.3192		11.2705	-7.95127	7.95127	247.497
		20.119	17.0672	3.0518		11.2705	-8.21867	8.21867	297.896
	48h	18.511	17.1032	1.4078		11.2705	-9.86267	9.86267	931.019	953.156	91.3046
		18.4537	16.9563	1.4974		11.2705	-9.77307	9.77307	874.956
		18.3434	17.1139	1.2295		11.2705	-10.041	10.041	1053.49
over-expression AIF1-NC		CSFV	GAPDH	△CT		Standard reference	△△CT	—△△CT		average	standard deviation
	0h	27.1561	15.7458	11.4103		11.7934	-0.383133	0.383133	1.30417	1.02265	0.265316
		27.3132	15.5002	11.813		11.7934	0.0195667	-0.0195667	0.986529
		27.4225	15.2655	12.157		11.7934	0.363567	-0.363567	0.777241
	12h	26.1542	16.7866	9.3676		11.7934	-2.42583	2.42583	5.37339	4.44623	0.887712
		26.4142	16.7455	9.6687		11.7934	-2.12473	2.12473	4.36122
		26.6592	16.7154	9.9438		11.7934	-1.84963	1.84963	3.60409
	24h	21.4265	15.7651	5.6614		11.7934	-6.13203	6.13203	70.1336	72.8446	4.6117
		21.2615	15.6021	5.6594		11.7934	-6.13403	6.13403	70.2309
		21.3561	15.8512	5.5049		11.7934	-6.28853	6.28853	78.1695
	48h	18.5855	15.6442	2.9413		11.7934	-8.85213	8.85213	462.123	544.288	75.4336
		18.3526	15.6893	2.6633		11.7934	-9.13013	9.13013	560.33
		18.3633	15.8235	2.5398		11.7934	-9.25363	9.25363	610.409
